# Supplementary material for: Alginate oligosaccharide extends the service lifespan by improving the sperm metabolome and gut microbiota in an aging Duroc boars model
Source: Front Cell Infect Microbiol. 2023 Dec 5;13:1308484. doi: 10.3389/fcimb.2023.1308484 (PMC10728478; doi:10.3389/fcimb.2023.1308484)
Supplement: Supplementary Table 4 — KEGG metabolic pathway enrichment data file. [file Table_4.xlsx]

## Sheet: all
ID Annotation	Annotation	in set	set	in background	background	RichFactor	p-value	-lg(p-value)	FDR correction	Matching IDs	URL
ssc00310	Lysine degradation	2	4	50	3244	0.04	0.00136987	2.86332	0.0246576	C00042 C01181	https://www.genome.jp/kegg-bin/show_pathway?ssc00310/ssc:C00042%09blue/ssc:C01181%09red
ssc04727	GABAergic synapse	1	4	9	3244	0.111111	0.0110564	1.95639	0.0721657	C00042	https://www.genome.jp/kegg-bin/show_pathway?ssc04727/ssc:C00042%09blue
ssc00190	Oxidative phosphorylation	1	4	16	3244	0.0625	0.0195922	1.70792	0.0721657	C00042	https://www.genome.jp/kegg-bin/show_pathway?ssc00190/ssc:C00042%09blue
ssc00020	Citrate cycle (TCA cycle)	1	4	20	3244	0.05	0.024445	1.61181	0.0721657	C00042	https://www.genome.jp/kegg-bin/show_pathway?ssc00020/ssc:C00042%09blue
ssc04024	cAMP signaling pathway	1	4	25	3244	0.04	0.0304856	1.51591	0.0721657	C00042	https://www.genome.jp/kegg-bin/show_pathway?ssc04024/ssc:C00042%09blue
ssc04922	Glucagon signaling pathway	1	4	25	3244	0.04	0.0304856	1.51591	0.0721657	C00042	https://www.genome.jp/kegg-bin/show_pathway?ssc04922/ssc:C00042%09blue
ssc00250	Alanine, aspartate and glutamate metabolism	1	4	28	3244	0.0357143	0.0340964	1.46729	0.0721657	C00042	https://www.genome.jp/kegg-bin/show_pathway?ssc00250/ssc:C00042%09blue
ssc05230	Central carbon metabolism in cancer	1	4	30	3244	0.0333333	0.036498	1.43773	0.0721657	C00042	https://www.genome.jp/kegg-bin/show_pathway?ssc05230/ssc:C00042%09blue
ssc00620	Pyruvate metabolism	1	4	31	3244	0.0322581	0.0376972	1.42369	0.0721657	C00042	https://www.genome.jp/kegg-bin/show_pathway?ssc00620/ssc:C00042%09blue
ssc00920	Sulfur metabolism	1	4	33	3244	0.030303	0.0400921	1.39694	0.0721657	C00042	https://www.genome.jp/kegg-bin/show_pathway?ssc00920/ssc:C00042%09blue
ssc00650	Butanoate metabolism	1	4	42	3244	0.0238095	0.0508139	1.29402	0.08315	C00042	https://www.genome.jp/kegg-bin/show_pathway?ssc00650/ssc:C00042%09blue
ssc00640	Propanoate metabolism	1	4	48	3244	0.0208333	0.0579117	1.23723	0.0868675	C00042	https://www.genome.jp/kegg-bin/show_pathway?ssc00640/ssc:C00042%09blue
ssc00760	Nicotinate and nicotinamide metabolism	1	4	55	3244	0.0181818	0.066142	1.17952	0.089182	C00042	https://www.genome.jp/kegg-bin/show_pathway?ssc00760/ssc:C00042%09blue
ssc00360	Phenylalanine metabolism	1	4	60	3244	0.0166667	0.0719878	1.14274	0.089182	C00042	https://www.genome.jp/kegg-bin/show_pathway?ssc00360/ssc:C00042%09blue
ssc00630	Glyoxylate and dicarboxylate metabolism	1	4	62	3244	0.016129	0.0743183	1.1289	0.089182	C00042	https://www.genome.jp/kegg-bin/show_pathway?ssc00630/ssc:C00042%09blue
ssc01040	Biosynthesis of unsaturated fatty acids	1	4	69	3244	0.0144928	0.0824409	1.08386	0.092746	C16527	https://www.genome.jp/kegg-bin/show_pathway?ssc01040/ssc:C16527%09blue
ssc00350	Tyrosine metabolism	1	4	78	3244	0.0128205	0.0928054	1.03243	0.0982645	C00042	https://www.genome.jp/kegg-bin/show_pathway?ssc00350/ssc:C00042%09blue
ssc00520	Amino sugar and nucleotide sugar metabolism	1	4	108	3244	0.00925926	0.126721	0.897152	0.126721	C00617	https://www.genome.jp/kegg-bin/show_pathway?ssc00520/ssc:C00617%09blue
